# Supplementary material
Source: PubMed Central journal article supplement (PMC4511941)
Supplement: ismej20152x1.pdf [file ismej20152x1.pdf]

## **Aquifer environment selects for microbial species cohorts in sediment and groundwater**

Laura A. Hug, Brian C. Thomas, Christopher T. Brown, Kyle R. Frischkorn, Kenneth H. Williams, Susannah G. Tringe, Jillian F. Banfield

### **SUPPLEMENTAL MATERIALS**

**Table S1:** Normalized abundance values for the 133 organisms across the 36 metagenomic datasets, with phylum designation for each organism appended. (Separate Excel workbook.)

**Table S2:** Nucleotide divergence between *rpS3* genes and ribosomal protein encoding scaffolds for organisms identified in both the CSP-I\_5m\_4 and RBG\_5m samples sharing >85% pairwise identity.

**Table S3:** Geochemical conditions determined from the metagenomic sampling sites.

**Figure S1:** Concatenated ribosomal protein tree for taxonomic placement of RBG\_5m and CSP-I\_5m\_4 organisms.

**Figure S2:** Experimental schema for the work reported in this study.

**Table S2:** Nucleotide divergence between *rpS3* genes and ribosomal protein encoding scaffolds for organisms identified in both the CSP-I\_5m\_4 and RBG\_5m samples sharing >85% pairwise identity.

| RBG scaffold names     | CSP scaffold names             | <i>rpS3</i> % ID | Ribosomal protein scaffold % ID | bp of scaffold overlap |
|------------------------|--------------------------------|------------------|---------------------------------|------------------------|
| RBG16c_scaffold_21741  | CSP2_16ft4sub_bin1_scaffold_25 | 100              | 97.93                           | 14,707                 |
| RBG16c_scaffold_26     | Rifle_16ft_4_minimus_37633     | 100              | 99.97                           | 11,989                 |
| RBG16c_scaffold_26     | Rifle_16ft_4_minimus_24053     | 100              | 97.96                           | 11,989                 |
| RBG16c_scaffold_2975   | Rifle_16ft_4_minimus_38035     | 100              | 98.4                            | 28,502                 |
| RBG16c_scaffold_2975   | Rifle_16ft_4_minimus_24026     | 100              | 99.45                           | 18,862                 |
| RBG16c_scaffold_4006   | Rifle_16ft_4_minimus_1461      | 100              | 99.93                           | 5,868                  |
| RBG16c_scaffold_43787  | Rifle_16ft_4_minimus_2958      | 100              | 98.56                           | 10,369                 |
| RBG16c_scaffold_613    | Rifle_16ft_4_minimus_184       | 100              | 99.89                           | 40,742                 |
| RBG16c_scaffold_613    | Rifle_16ft_4_minimus_36741     | 100              | 99.68                           | 4,695                  |
| RBG16c_scaffold_966    | Rifle_16ft_4_minimus_15147     | 100              | 100                             | 5,641                  |
| RBG16c_scaffold_5334   | Rifle_16ft_4_minimus_3054      | 99.9             | 99.65                           | 9,016                  |
| RBG16c_scaffold_5757   | Rifle_16ft_4_minimus_23719     | 99.89            | 99.51                           | 40,080                 |
| RBG16c_scaffold_5757   | Rifle_16ft_4_minimus_37664     | 99.89            | 99.82                           | 56,902                 |
| RBG9_49                | Rifle_16ft_4_minimus_38099     | 99.85            | 99.83                           | 31,132                 |
| RBG16c_scaffold_12982  | CSP2_16ft4sub_bin8_scaffold_14 | 99.7             | 99.85                           | 8,905                  |
| RBG16c_scaffold_11510  | Rifle_16ft_4_minimus_38982     | 99.69            | 99.58                           | 19,991                 |
| RBG16c_scaffold_21377  | Rifle_16ft_4_minimus_5175      | 99.55            | 98.45                           | 2,131                  |
| RBG16c_scaffold_21377  | Rifle_16ft_4_minimus_39832     | 99.4             | 99                              | 8,445                  |
| RBG16c_scaffold_17034  | Rifle_16ft_4_minimus_24570     | 98.45            | 96.64                           | 8,674                  |
| RBG16c_scaffold_17034  | Rifle_16ft_4_minimus_4190      | 98.4             | 96.48                           | 8,021                  |
| RBG16c_scaffold_14114  | Rifle_16ft_4_minimus_30550     | 97.78            | 96.5                            | 3,452                  |
| RBG16c_scaffold_2413   | Rifle_16ft_4_minimus_15241     | 97.5             | 96.03                           | 7,510                  |
| RBG16c_scaffold_6059   | Rifle_16ft_4_minimus_21028     | 97.45            | 99.89                           | 5,496                  |
| RBG16c_scaffold_70150  | Rifle_16ft_4_minimus_5046      | 97.14            | 99.33                           | 13,174                 |
| RBG16c_scaffold_105097 | Rifle_16ft_4_minimus_30456     | 96.68            | 91.05                           | 4,515                  |
| RBG16c_scaffold_105097 | Rifle_16ft_4_minimus_1560      | 92.2             | 85.94                           | 13,125                 |
| RBG16c_scaffold_8450   | Rifle_16ft_4_minimus_37862     | 91.16            | 87.76                           | 23,391                 |
| RBG16c_scaffold_291    | Rifle_16ft_4_minimus_20697     | 88.59            | 85.9                            | 5,440                  |
| RBG16c_scaffold_15232  | Rifle_16ft_4_minimus_1560      | 87.55            | 74.24                           | 15,960                 |
| RBG16c_scaffold_2679   | Rifle_16ft_4_minimus_23719     | 87.18            | 78.9                            | 34,358                 |
| RBG16c_scaffold_2679   | Rifle_16ft_4_minimus_37664     | 87.18            | 78.9                            | 38,357                 |
| RBG16c_scaffold_15232  | Rifle_16ft_4_minimus_30456     | 87.15            | 74.88                           | 5,398                  |
| RBG16c_scaffold_10561  | Rifle_16ft_4_minimus_30456     | 86.38            | 79.9                            | 5,429                  |
| RBG16c_scaffold_5757   | Rifle_16ft_4_minimus_34155     | 86.31            | 75.35                           | 9,361                  |
| RBG16c_scaffold_388    | Rifle_16ft_4_minimus_10062     | 86.28            | 78.53                           | 14,536                 |

continued

| RBG scaffold names    | CSP scaffold names         | <i>rpS3</i> %<br>ID | Ribosomal<br>protein<br>scaffold %<br>ID | bp of<br>scaffold<br>overlap |
|-----------------------|----------------------------|---------------------|------------------------------------------|------------------------------|
| RBG16c_scaffold_5757  | Rifle_16ft_4_minimus_309   | 86.14               | 76.52                                    | 29,871                       |
| RBG16c_scaffold_936   | Rifle_16ft_4_minimus_9892  | 85.88               | 83.21                                    | 13,017                       |
| RBG16c_scaffold_5757  | Rifle_16ft_4_minimus_39    | 85.84               | 73.35                                    | 36,639                       |
| RBG16c_scaffold_5930  | Rifle_16ft_4_minimus_34155 | 85.66               | 72.66                                    | 9,707                        |
| RBG16c_scaffold_5757  | Rifle_16ft_4_minimus_37884 | 85.64               | 76.25                                    | 24,428                       |
| RBG16c_scaffold_5757  | Rifle_16ft_4_minimus_25120 | 85.64               | 77.28                                    | 13,816                       |
| RBG16c_scaffold_10561 | Rifle_16ft_4_minimus_1560  | 85.61               | 78.17                                    | 14,329                       |
| RBG16c_scaffold_39454 | Rifle_16ft_4_minimus_30456 | 85.52               | 77.85                                    | 5,478                        |
| RBG16c_scaffold_2576  | Rifle_16ft_4_minimus_1560  | 85.39               | 73.5                                     | 14,327                       |
| RBG16c_scaffold_23587 | Rifle_16ft_4_minimus_2010  | 85.3                | 84.04                                    | 9,646                        |
| RBG16c_scaffold_388   | Rifle_16ft_4_minimus_37664 | 85                  | 72.33                                    | 12,367                       |
| RBG16c_scaffold_388   | Rifle_16ft_4_minimus_23719 | 85                  | 71.28                                    | 20,710                       |

**Table S3:** Geochemical conditions determined from the metagenomic sampling sites. All geochemical analyses are based on groundwater sampling, where the closest available date of sampling to when the metagenomic samples were taken is reported. Geochemical species measurements are in mg/L except where otherwise indicated, and were determined as described previously (phosphate, N'Guessan *et al.*, 2010; nitrogen species, Mouser *et al.*, 2009; others, Williams *et al.*, 2011). EC = electrical conductance, DO = dissolved oxygen, ND = not determined.

| DATASET                              | CSP-I      | CSP-II/CSP_GW                                        | RBG        | AAC1       | GW2011     |
|--------------------------------------|------------|------------------------------------------------------|------------|------------|------------|
| <b>Metagenomic<br/>sampling date</b> | 07/20/2011 | 03/28/2013 (sed),<br>06/03/2013 &<br>07/07/2013 (GW) | 07/2007    | 07/2010    | 07/2011    |
| <b>Geochemical<br/>sampling date</b> | 09/12/2011 | 06/12/2012                                           | 07/18/2008 | 07/30/2010 | 07/11/2011 |
| <b>Well name</b>                     | FP-101     | FP-101                                               | D-04       | CD-01      | CD-01      |
| <b>pH</b>                            | 7.11       | 7.56                                                 | ND         | ND         | 7.25       |
| <b>EC (uS/cm)</b>                    | 2579       | 3250                                                 | ND         | ND         | 2639       |
| <b>DO</b>                            | 0.784      | 0.329                                                | ND         | ND         | ND         |
| <b>Fe<sup>2+</sup></b>               | 0.01       | 0.25                                                 | 3.13       | ND         | 1.68       |
| <b>Cl<sup>-</sup></b>                | 203.13     | ND                                                   | 163.4      | 182.9      | 188.2      |
| <b>NO<sub>3</sub><sup>-</sup></b>    | 6.4        | 4.3                                                  | 0.19       | ND         | ND         |
| <b>NO<sub>2</sub><sup>-</sup></b>    | 0.144      | 0.137                                                | 0.02       | ND         | ND         |
| <b>NH<sub>4</sub><sup>+</sup></b>    | 0.03       | 0.00                                                 | 1.95       | ND         | ND         |
| <b>PO<sub>4</sub><sup>3-</sup></b>   | 0.16       | 0.15                                                 | 0.11       | ND         | ND         |
| <b>SO<sub>4</sub><sup>2-</sup></b>   | 816.5      | ND                                                   | 838.6      | 782.9      | 816.5      |

## REFERENCES

Mouser PJ, N'Guessan AL, Elifantz H, Holmes DE, Williams KH, Wilkins MJ, *et al.* (2009). Influence of heterogeneous ammonium availability on bacterial community structure and the expression of nitrogen fixation and ammonium transporter genes during in situ bioremediation of uranium-contaminated groundwater. *Environ Sci Technol* **43**:4386–92.

N'Guessan AL, Elifantz H, Nevin KP, Mouser PJ, Methé B, Woodard TL, *et al.* (2010). Molecular analysis of phosphate limitation in Geobacteraceae during the bioremediation of a uranium-contaminated aquifer. *ISME J* **4**:253–66.

Williams KH, Long PE, Davis JA, Wilkins MJ, N'Guessan AL, Steefel CI, *et al.* (2011). Acetate availability and its influence on sustainable bioremediation of Uranium-contaminated groundwater. *Geomicrobiol J* **28**:519–539.

**Figure S1 (next page):** Concatenated ribosomal protein tree including CSP-I\_5m\_4 (blue) and RBG\_5m (red) organisms. Ribosomal proteins utilized were RpL2, 3, 4, 5, 6, 14, 15, 16, 18, 22, 24 and RpS3, 8, 10, 17, 19. For a scaffold to be included, a minimum of 8 of the 16 genes was required. Each individual gene set was aligned using MUSCLE version 3.8.31 and then manually curated to remove end gaps and ambiguously aligned regions. The curated alignments were concatenated to form a 16-gene, 1,319 taxa, 2,304-position alignment. A maximum likelihood phylogeny for the concatenated alignment was conducted using RAxML under the LG+ $\alpha$ + $\gamma$  model of evolution and with 100 bootstrap replicates. Bootstrap values greater than 50 are displayed on the tree nodes.

CSP\_15m\_4 organisms

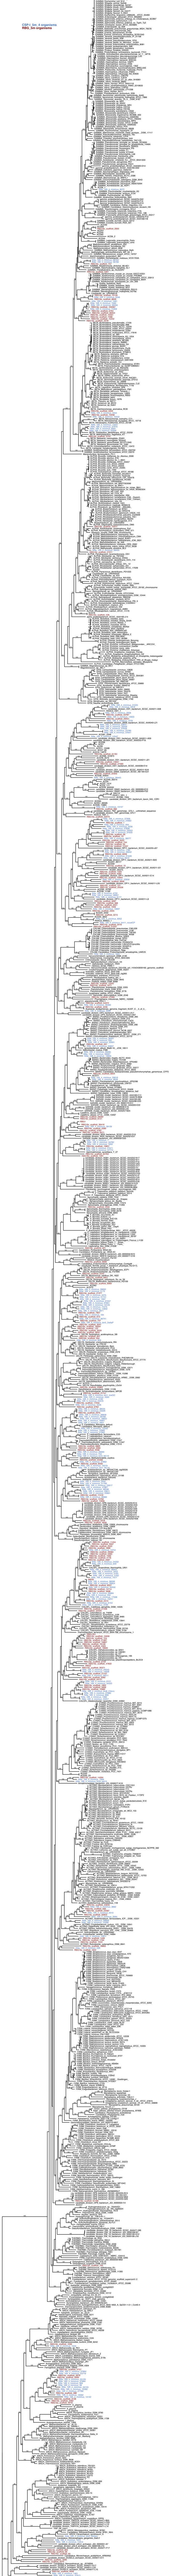

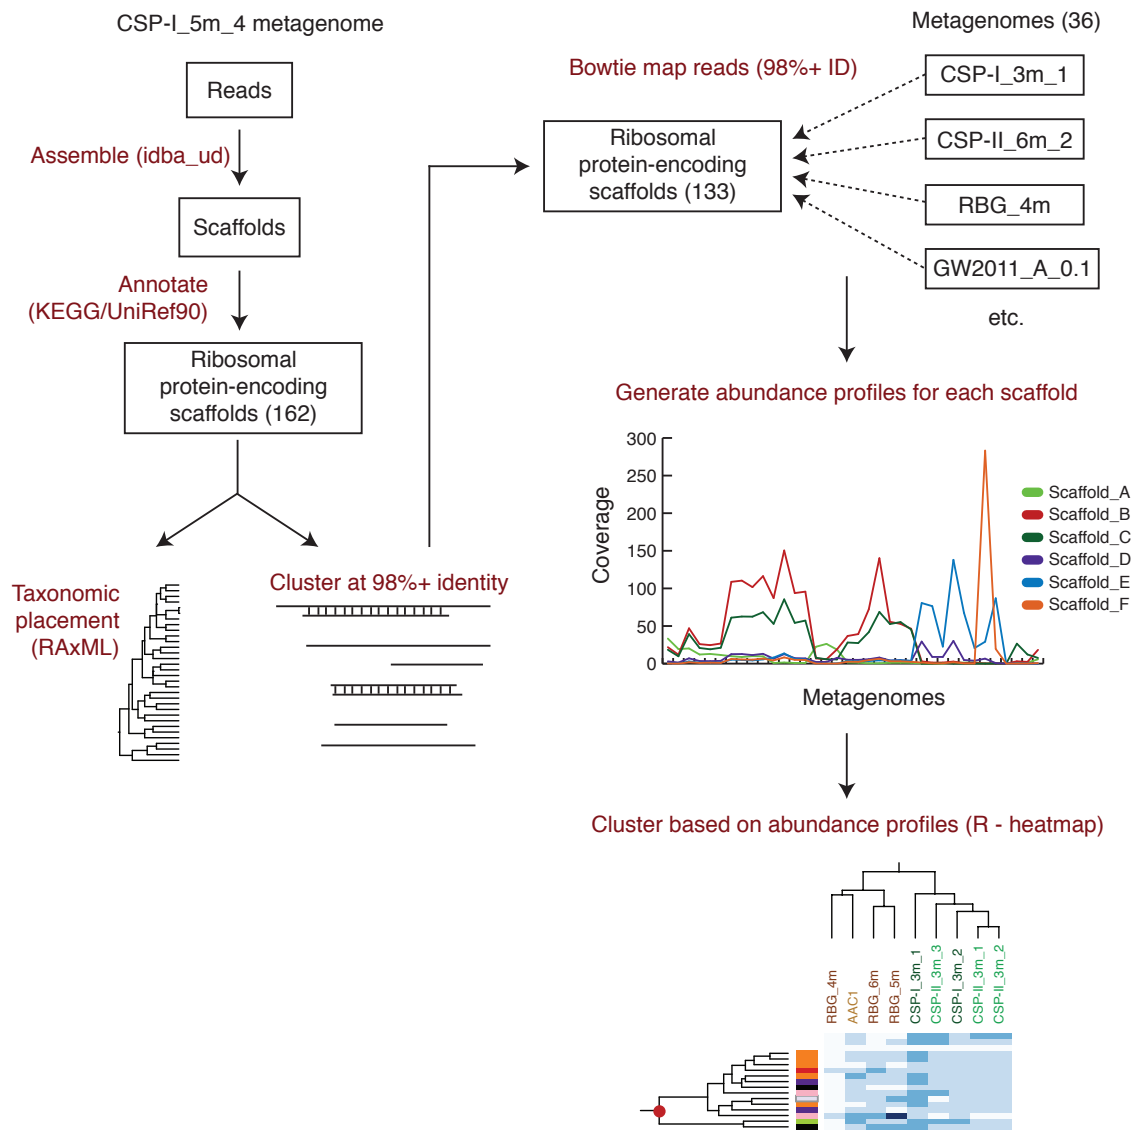

**Figure S2:** Experimental schema for the work reported in this study.
